# Supplementary material for: Transposon accumulation at xenobiotic gene family loci in aphids
Source: HighWire-hosted journal article supplement (doi:10.1101/gr.277820.123), 2023-10-01
Supplement: Supplemental_Figure_S1.pdf [file Supplemental_Figure_S1.pdf]

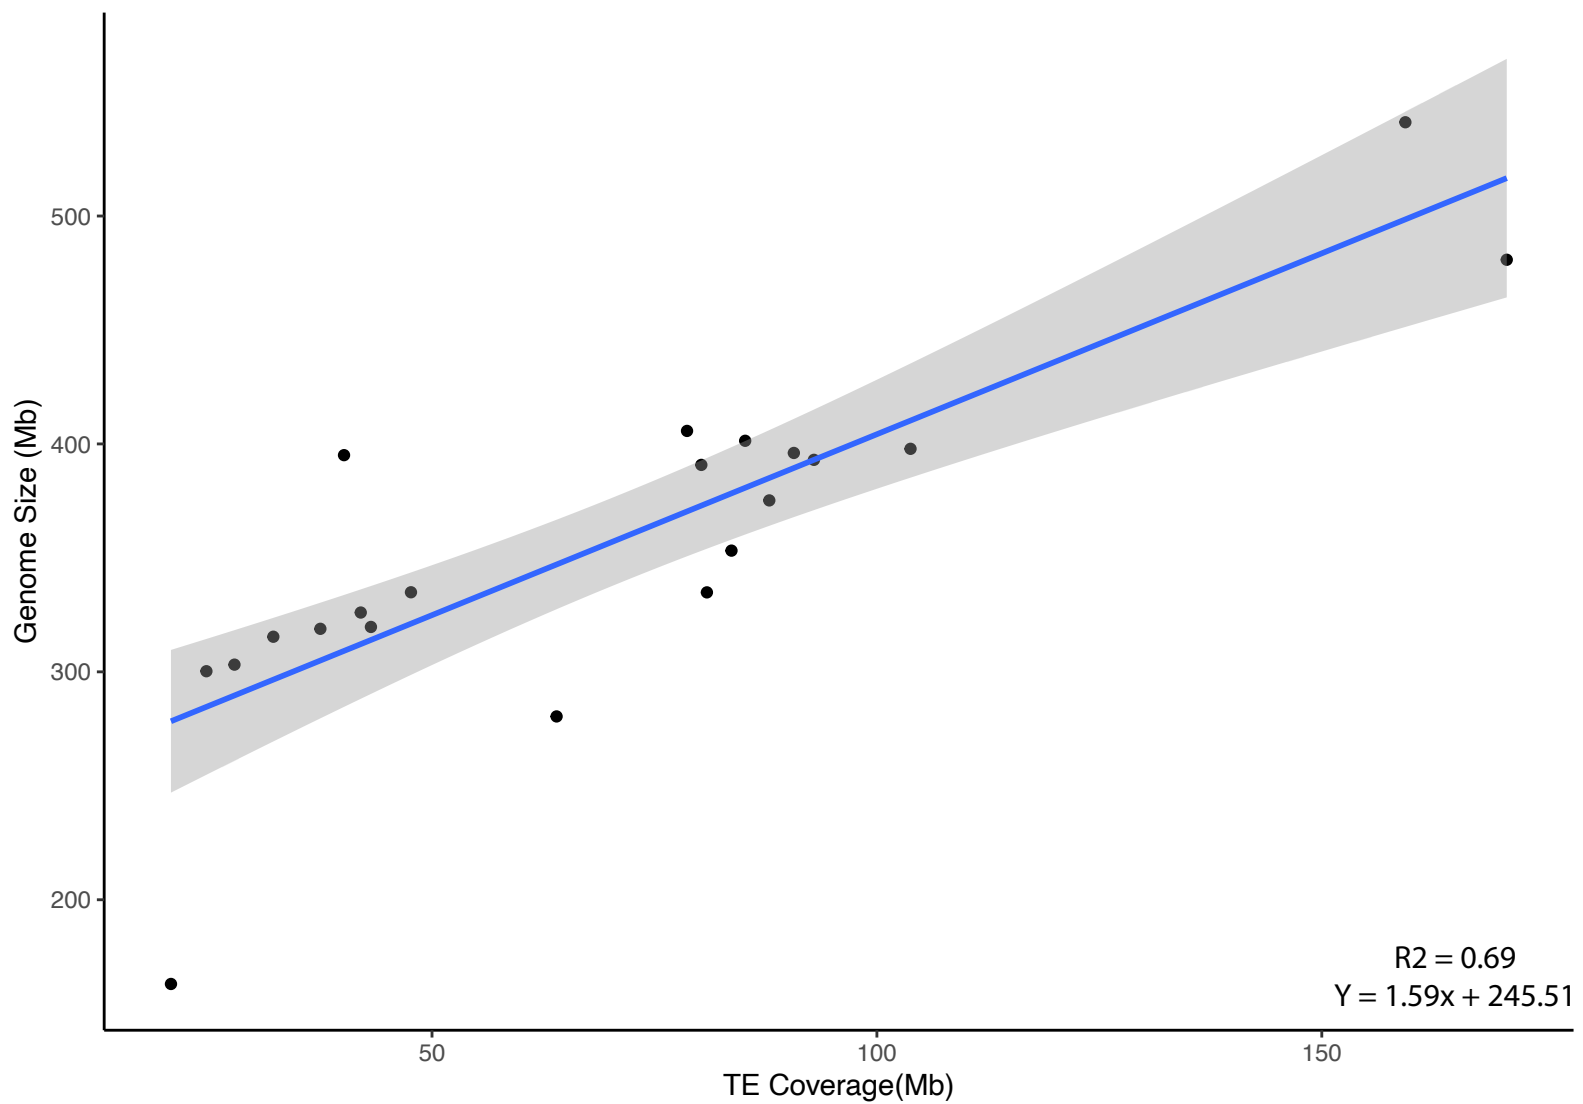

Supplemental Figure S1. The relationship between TE content and genome size in aphids. Blue line indicates the relationship calculated using linear regression. Grey area indicates 95% confidence intervals.
