# Supplementary material for: Transposon accumulation at xenobiotic gene family loci in aphids
Source: HighWire-hosted journal article supplement (doi:10.1101/gr.277820.123), 2023-10-01
Supplement: Supplemental_Figure_S2.pdf [file Supplemental_Figure_S2.pdf]

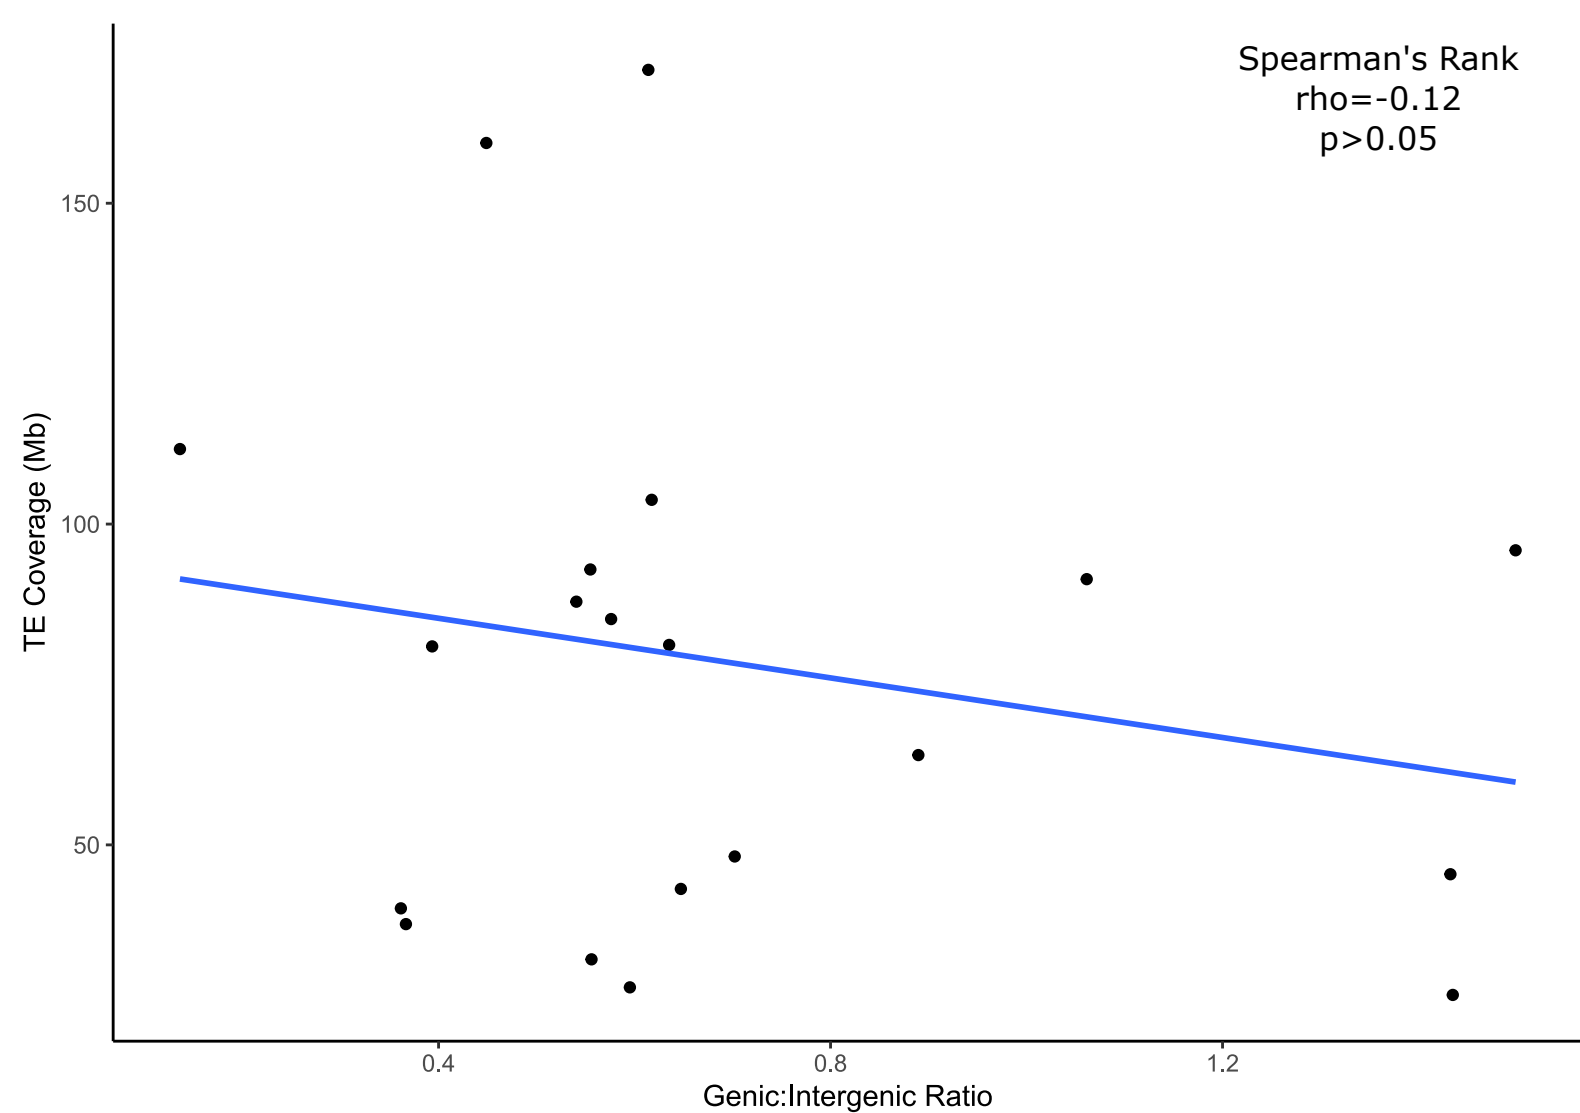

Supplemental Figure S2. Correlation between genic:intergenic base pairs ratio and TE content in aphids.
