# Supplementary material for: Transposon accumulation at xenobiotic gene family loci in aphids
Source: HighWire-hosted journal article supplement (doi:10.1101/gr.277820.123), 2023-10-01
Supplement: Supplemental_Figure_S5.pdf [file Supplemental_Figure_S5.pdf]

# Xenobiotic Resistance Genes

## vs Housekeeping Genes

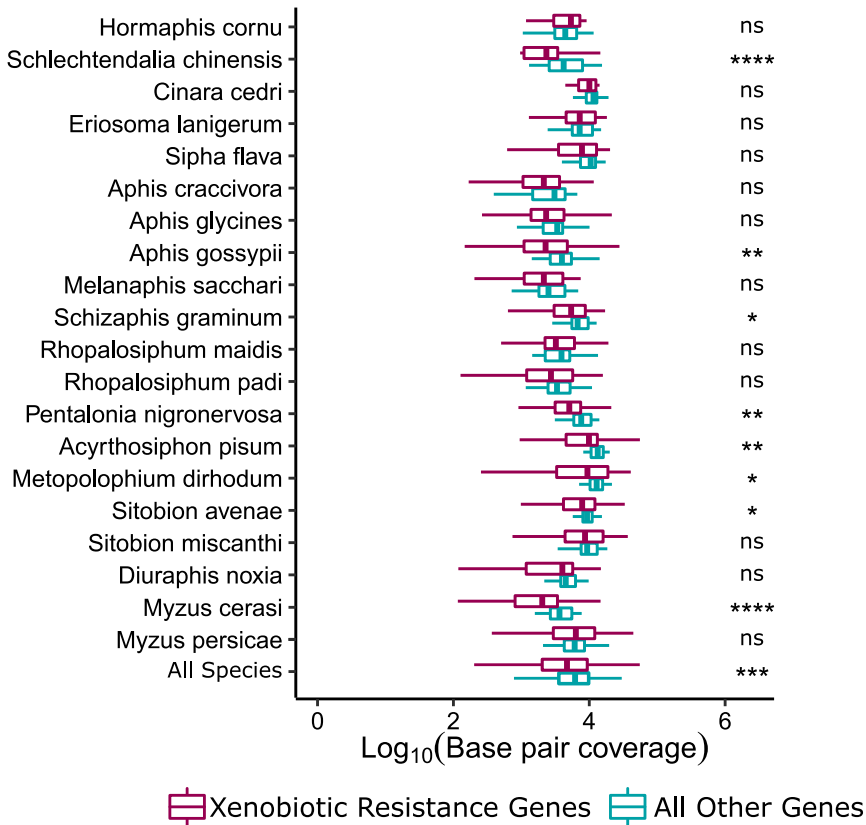

Supplemental Figure S5. TE coverage around xenobiotic gene family loci compared to housekeeping genes.
